# Supplementary material for: Consistency, completeness and external validity of ethnicity recording in NHS primary care records: a cohort study in 25 million patients’ records at source using OpenSAFELY
Source: bioRxiv or medRxiv preprint supplement (doi:10.1101/2023.11.21.23298690), 2023-11-22
Supplement: Supplementary file [file media-1.pdf]

Table 1: Count of patients with a recorded ethnicity in OpenSAFELY-TPP (proportion of registered TPP population) by clinical and demographic subgroups. All counts are rounded to the nearest 5.

|                          | SNOMED 2022       | SNOMED 2022 with SUS data | Population | Percentage point increase with SUS data |
|--------------------------|-------------------|---------------------------|------------|-----------------------------------------|
| all                      |                   |                           |            |                                         |
| with records             | 19,618,135 (78.2) | 23,228,760 (92.5)         | 25,102,210 | (14.3)                                  |
| age band                 |                   |                           |            |                                         |
| 0-19                     | 3,506,695 (63.6)  | 5,019,200 (91.1)          | 5,509,975  | (27.5)                                  |
| 20-29                    | 2,300,970 (73.6)  | 2,767,405 (88.5)          | 3,128,250  | (14.9)                                  |
| 30-39                    | 2,985,455 (83.0)  | 3,327,535 (92.5)          | 3,597,050  | (9.5)                                   |
| 40-49                    | 2,730,080 (84.5)  | 2,989,030 (92.6)          | 3,228,995  | (8.1)                                   |
| 50-59                    | 2,887,720 (83.9)  | 3,199,355 (93.0)          | 3,440,755  | (9.1)                                   |
| 60-69                    | 2,326,765 (84.9)  | 2,589,095 (94.5)          | 2,741,010  | (9.6)                                   |
| 70-79                    | 1,875,495 (85.2)  | 2,118,495 (96.2)          | 2,201,400  | (11.0)                                  |
| 80+                      | 1,004,955 (80.1)  | 1,218,635 (97.1)          | 1,254,775  | (17.0)                                  |
| sex                      |                   |                           |            |                                         |
| Female                   | 10,005,930 (79.8) | 11,782,895 (94.0)         | 12,532,940 | (14.2)                                  |
| Male                     | 9,612,205 (76.5)  | 11,445,860 (91.1)         | 12,569,270 | (14.6)                                  |
| region                   |                   |                           |            |                                         |
| East                     | 4,488,910 (77.3)  | 5,355,465 (92.2)          | 5,808,670  | (14.9)                                  |
| East Midlands            | 3,413,070 (78.6)  | 4,020,145 (92.6)          | 4,343,010  | (14.0)                                  |
| London                   | 1,460,750 (81.4)  | 1,629,015 (90.7)          | 1,795,300  | (9.3)                                   |
| North East               | 914,095 (78.0)    | 1,103,540 (94.2)          | 1,171,695  | (16.2)                                  |
| North West               | 1,693,835 (78.4)  | 2,029,735 (94.0)          | 2,159,325  | (15.6)                                  |
| South East               | 1,265,915 (77.0)  | 1,502,860 (91.4)          | 1,644,505  | (14.4)                                  |
| South West               | 2,697,960 (77.4)  | 3,219,590 (92.4)          | 3,483,925  | (15.0)                                  |
| West Midlands            | 837,230 (82.2)    | 947,725 (93.0)            | 1,018,680  | (10.8)                                  |
| Yorkshire and The Humber | 2,816,935 (77.4)  | 3,385,170 (93.0)          | 3,638,855  | (15.6)                                  |
| IMD                      |                   |                           |            |                                         |
| 1 Most deprived          | 3,885,360 (78.2)  | 4,633,110 (93.3)          | 4,968,330  | (15.1)                                  |
| 2                        | 3,821,805 (78.5)  | 4,515,210 (92.8)          | 4,868,115  | (14.3)                                  |
| 3                        | 4,027,315 (78.9)  | 4,724,895 (92.6)          | 5,102,160  | (13.7)                                  |
| 4                        | 3,871,300 (78.3)  | 4,559,785 (92.3)          | 4,942,265  | (14.0)                                  |
| 5 Least deprived         | 3,482,535 (77.7)  | 4,116,455 (91.8)          | 4,481,755  | (14.1)                                  |
| Unknown                  | 529,815 (71.6)    | 679,300 (91.8)            | 739,585    | (20.2)                                  |
| dementia                 |                   |                           |            |                                         |
| Present                  | 36,645 (82.2)     | 44,075 (98.9)             | 44,560     | (16.7)                                  |
| Absent                   | 19,581,490 (78.1) | 23,184,680 (92.5)         | 25,057,655 | (14.4)                                  |
| diabetes                 |                   |                           |            |                                         |
| Present                  | 2,049,495 (85.6)  | 2,335,080 (97.5)          | 2,394,370  | (11.9)                                  |
| Absent                   | 17,568,640 (77.4) | 20,893,675 (92.0)         | 22,707,845 | (14.6)                                  |
| hypertension             |                   |                           |            |                                         |
| Present                  | 1,621,375 (86.0)  | 1,833,885 (97.2)          | 1,886,165  | (11.2)                                  |
| Absent                   | 17,996,755 (77.5) | 21,394,870 (92.2)         | 23,216,045 | (14.7)                                  |
| learning disability      |                   |                           |            |                                         |
| Present                  | 120,385 (84.2)    | 137,380 (96.1)            | 143,025    | (11.9)                                  |
| Absent                   | 19,497,750 (78.1) | 23,091,375 (92.5)         | 24,959,185 | (14.4)                                  |
