# Supplementary material for: Consistency, completeness and external validity of ethnicity recording in NHS primary care records: a cohort study in 25 million patients’ records at source using OpenSAFELY
Source: bioRxiv or medRxiv preprint supplement (doi:10.1101/2023.11.21.23298690), 2023-11-22
Supplement: Supplementary file [file media-2.pdf]

Table 2: Count of patients with a recorded ethnicity in OpenSAFELY TPP by ethnicity group (proportion of registered TPP population) and clinical and demographic subgroups. All counts are rounded to the nearest 5.

|                     |                          | Asian           |                           | Black         |                           | Mixed         |                           | White             |                           | Other         |                           |
|---------------------|--------------------------|-----------------|---------------------------|---------------|---------------------------|---------------|---------------------------|-------------------|---------------------------|---------------|---------------------------|
|                     |                          | SNOMED 2022     | SNOMED 2022 with SUS data | SNOMED 2022   | SNOMED 2022 with SUS data | SNOMED 2022   | SNOMED 2022 with SUS data | SNOMED 2022       | SNOMED 2022 with SUS data | SNOMED 2022   | SNOMED 2022 with SUS data |
| all                 | with records             | 1,708,430 (6.8) | 1,955,095 (7.8)           | 583,770 (2.3) | 659,410 (2.6)             | 367,980 (1.5) | 466,220 (1.9)             | 16,468,610 (65.6) | 19,566,635 (77.9)         | 489,350 (1.9) | 581,395 (2.3)             |
| age band            | 0-19                     | 383,285 (7.0)   | 536,695 (9.7)             | 138,355 (2.5) | 182,015 (3.3)             | 137,175 (2.5) | 210,360 (3.8)             | 2,754,320 (50.0)  | 3,951,305 (71.7)          | 93,560 (1.7)  | 138,830 (2.5)             |
|                     | 20-29                    | 259,930 (8.3)   | 289,485 (9.3)             | 86,955 (2.8)  | 95,870 (3.1)              | 63,215 (2.0)  | 72,340 (2.3)              | 1,775,885 (56.8)  | 2,180,550 (69.7)          | 114,985 (3.7) | 129,165 (4.1)             |
|                     | 30-39                    | 363,460 (10.1)  | 386,210 (10.7)            | 102,485 (2.8) | 109,505 (3.0)             | 64,395 (1.8)  | 70,745 (2.0)              | 2,350,510 (65.3)  | 2,644,670 (73.5)          | 104,605 (2.9) | 116,405 (3.2)             |
|                     | 40-49                    | 315,825 (9.8)   | 331,920 (10.3)            | 104,610 (3.2) | 109,780 (3.4)             | 46,475 (1.4)  | 49,975 (1.5)              | 2,181,060 (67.5)  | 2,407,950 (74.6)          | 82,105 (2.5)  | 89,405 (2.8)              |
|                     | 50-59                    | 182,030 (5.3)   | 192,220 (5.6)             | 85,405 (2.5)  | 90,855 (2.6)              | 31,895 (0.9)  | 34,685 (1.0)              | 2,539,560 (73.8)  | 2,827,325 (82.2)          | 48,835 (1.4)  | 54,280 (1.6)              |
|                     | 60-69                    | 116,945 (4.3)   | 124,535 (4.5)             | 40,280 (1.5)  | 43,280 (1.6)              | 15,365 (0.6)  | 16,995 (0.6)              | 2,126,970 (77.6)  | 2,373,055 (86.6)          | 27,200 (1.0)  | 31,230 (1.1)              |
|                     | 70-79                    | 58,290 (2.6)    | 62,645 (2.8)              | 14,745 (0.7)  | 15,960 (0.7)              | 6,290 (0.3)   | 7,285 (0.3)               | 1,783,385 (81.0)  | 2,017,300 (91.6)          | 12,785 (0.6)  | 15,305 (0.7)              |
|                     | 80+                      | 28,670 (2.3)    | 31,390 (2.5)              | 10,930 (0.9)  | 12,145 (1.0)              | 3,165 (0.3)   | 3,840 (0.3)               | 956,915 (76.3)    | 1,164,480 (92.8)          | 5,270 (0.4)   | 6,780 (0.5)               |
| sex                 | Female                   | 827,980 (6.6)   | 949,050 (7.6)             | 291,010 (2.3) | 328,460 (2.6)             | 186,680 (1.5) | 234,280 (1.9)             | 8,461,075 (67.5)  | 9,987,690 (79.7)          | 239,185 (1.9) | 283,420 (2.3)             |
|                     | Male                     | 880,450 (7.0)   | 1,006,045 (8.0)           | 292,760 (2.3) | 330,955 (2.6)             | 181,300 (1.4) | 231,940 (1.8)             | 8,007,535 (63.7)  | 9,578,950 (76.2)          | 250,160 (2.0) | 297,980 (2.4)             |
| region              | East                     | 300,605 (5.2)   | 342,735 (5.9)             | 147,865 (2.5) | 168,770 (2.9)             | 89,825 (1.5)  | 116,180 (2.0)             | 3,856,555 (66.4)  | 4,617,355 (79.5)          | 94,055 (1.6)  | 110,425 (1.9)             |
|                     | East Midlands            | 319,445 (7.4)   | 360,305 (8.3)             | 97,320 (2.2)  | 110,695 (2.5)             | 60,985 (1.4)  | 81,860 (1.9)              | 2,867,445 (66.0)  | 3,386,935 (78.0)          | 67,880 (1.6)  | 80,350 (1.9)              |
|                     | London                   | 368,555 (20.5)  | 403,495 (22.5)            | 123,080 (6.9) | 138,875 (7.7)             | 60,995 (3.4)  | 70,810 (3.9)              | 775,090 (43.2)    | 853,735 (47.6)            | 133,035 (7.4) | 162,100 (9.0)             |
|                     | North East               | 48,500 (4.1)    | 58,495 (5.0)              | 19,950 (1.7)  | 22,990 (2.0)              | 13,465 (1.1)  | 18,160 (1.5)              | 811,235 (69.2)    | 977,415 (83.4)            | 20,940 (1.8)  | 26,485 (2.3)              |
|                     | North West               | 68,150 (3.2)    | 78,725 (3.6)              | 17,470 (0.8)  | 19,705 (0.9)              | 14,420 (0.7)  | 19,055 (0.9)              | 1,570,265 (72.7)  | 1,882,895 (87.2)          | 23,535 (1.1)  | 29,350 (1.4)              |
|                     | South East               | 59,670 (3.6)    | 66,180 (4.0)              | 23,510 (1.4)  | 25,550 (1.6)              | 23,715 (1.4)  | 28,355 (1.7)              | 1,128,545 (68.6)  | 1,348,710 (82.0)          | 30,470 (1.9)  | 34,070 (2.1)              |
|                     | South West               | 71,795 (2.1)    | 78,600 (2.3)              | 25,735 (0.7)  | 28,730 (0.8)              | 33,950 (1.0)  | 42,945 (1.2)              | 2,529,835 (72.6)  | 3,026,520 (86.9)          | 36,640 (1.1)  | 42,795 (1.2)              |
|                     | West Midlands            | 174,370 (17.1)  | 194,405 (19.1)            | 65,400 (6.4)  | 72,195 (7.1)              | 29,220 (2.9)  | 33,420 (3.3)              | 540,185 (53.0)    | 615,885 (60.5)            | 28,055 (2.8)  | 31,815 (3.1)              |
|                     | Yorkshire and The Humber | 294,930 (8.1)   | 369,235 (10.1)            | 62,195 (1.7)  | 70,370 (1.9)              | 40,435 (1.1)  | 54,080 (1.5)              | 2,365,245 (65.0)  | 2,828,245 (77.7)          | 54,135 (1.5)  | 63,245 (1.7)              |
| IMD                 | 1 Most deprived          | 552,360 (11.1)  | 646,705 (13.0)            | 232,370 (4.7) | 262,400 (5.3)             | 100,090 (2.0) | 127,030 (2.6)             | 2,882,250 (58.0)  | 3,452,775 (69.5)          | 118,290 (2.4) | 144,200 (2.9)             |
|                     | 2                        | 460,265 (9.5)   | 521,460 (10.7)            | 143,240 (2.9) | 161,860 (3.3)             | 79,195 (1.6)  | 99,685 (2.0)              | 3,029,195 (62.2)  | 3,600,725 (74.0)          | 109,910 (2.3) | 131,485 (2.7)             |
|                     | 3                        | 312,525 (6.1)   | 349,530 (6.9)             | 91,495 (1.8)  | 102,700 (2.0)             | 68,860 (1.3)  | 86,075 (1.7)              | 3,460,745 (67.8)  | 4,076,195 (79.9)          | 93,695 (1.8)  | 110,400 (2.2)             |
|                     | 4                        | 197,745 (4.0)   | 222,365 (4.5)             | 59,885 (1.2)  | 67,155 (1.4)              | 59,330 (1.2)  | 74,685 (1.5)              | 3,468,920 (70.2)  | 4,096,445 (82.9)          | 85,420 (1.7)  | 99,135 (2.0)              |
|                     | 5 Least deprived         | 142,175 (3.2)   | 160,720 (3.6)             | 37,805 (0.8)  | 42,430 (0.9)              | 48,195 (1.1)  | 61,140 (1.4)              | 3,190,305 (71.2)  | 3,777,735 (84.3)          | 64,055 (1.4)  | 74,435 (1.7)              |
|                     | Unknown                  | 43,360 (5.9)    | 54,320 (7.3)              | 18,970 (2.6)  | 22,865 (3.1)              | 12,310 (1.7)  | 17,610 (2.4)              | 437,195 (59.1)    | 562,760 (76.1)            | 17,980 (2.4)  | 21,740 (2.9)              |
| dementia            | Present                  | 1,325 (3.0)     | 1,455 (3.3)               | 625 (1.4)     | 705 (1.6)                 | 155 (0.3)     | 180 (0.4)                 | 34,360 (77.1)     | 41,485 (93.1)             | 180 (0.4)     | 250 (0.6)                 |
|                     | Absent                   | 1,707,105 (6.8) | 1,953,640 (7.8)           | 583,140 (2.3) | 658,705 (2.6)             | 367,820 (1.5) | 466,040 (1.9)             | 16,434,250 (65.6) | 19,525,150 (77.9)         | 489,170 (2.0) | 581,145 (2.3)             |
| diabetes            | Present                  | 275,225 (11.5)  | 294,210 (12.3)            | 73,500 (3.1)  | 78,875 (3.3)              | 23,905 (1.0)  | 26,450 (1.1)              | 1,643,120 (68.6)  | 1,896,130 (79.2)          | 33,740 (1.4)  | 39,415 (1.6)              |
|                     | Absent                   | 1,433,205 (6.3) | 1,660,885 (7.3)           | 510,265 (2.2) | 580,540 (2.6)             | 344,075 (1.5) | 439,770 (1.9)             | 14,825,490 (65.3) | 17,670,505 (77.8)         | 455,605 (2.0) | 541,980 (2.4)             |
| hypertension        | Present                  | 77,420 (4.1)    | 82,950 (4.4)              | 35,695 (1.9)  | 38,290 (2.0)              | 11,145 (0.6)  | 12,420 (0.7)              | 1,483,585 (78.7)  | 1,684,145 (89.3)          | 13,535 (0.7)  | 16,085 (0.9)              |
|                     | Absent                   | 1,631,010 (7.0) | 1,872,140 (8.1)           | 548,075 (2.4) | 621,125 (2.7)             | 356,835 (1.5) | 453,800 (2.0)             | 14,985,025 (64.5) | 17,882,495 (77.0)         | 475,815 (2.0) | 565,315 (2.4)             |
| learning disability | Present                  | 8,450 (5.9)     | 9,750 (6.8)               | 2,745 (1.9)   | 3,085 (2.2)               | 2,000 (1.4)   | 2,450 (1.7)               | 106,145 (74.2)    | 120,710 (84.4)            | 1,040 (0.7)   | 1,385 (1.0)               |
|                     | Absent                   | 1,699,980 (6.8) | 1,945,345 (7.8)           | 581,020 (2.3) | 656,325 (2.6)             | 365,980 (1.5) | 463,770 (1.9)             | 16,362,460 (65.6) | 19,445,925 (77.9)         | 488,310 (2.0) | 580,010 (2.3)             |
