# Supplementary material for: Consistency, completeness and external validity of ethnicity recording in NHS primary care records: a cohort study in 25 million patients’ records at source using OpenSAFELY
Source: bioRxiv or medRxiv preprint supplement (doi:10.1101/2023.11.21.23298690), 2023-11-22
Supplement: Supplementary file [file media-3.pdf]

Table 3: Count of patients with a recorded ethnicity in OpenSAFELY TPP by ethnicity group (proportion of registered TPP population) and clinical and demographic subgroups. All counts are rounded to the nearest 5.

|          |                          | Indian          |                           | Pakistani     |                           | Bangladeshi   |                           | Other Asian   |                           | Caribbean     |                           | African       |                           | Other Black   |                           | White and Black Caribbean |                           | White and Black African |                           | White and Asian |                           | Other Mixed   |                           | White British     |                           | White Irish      |                           | Other White     |                           | Chinese        |                           | Any other ethnic group |               |
|----------|--------------------------|-----------------|---------------------------|---------------|---------------------------|---------------|---------------------------|---------------|---------------------------|---------------|---------------------------|---------------|---------------------------|---------------|---------------------------|---------------------------|---------------------------|-------------------------|---------------------------|-----------------|---------------------------|---------------|---------------------------|-------------------|---------------------------|------------------|---------------------------|-----------------|---------------------------|----------------|---------------------------|------------------------|---------------|
|          |                          | SNOMED 2022     | SNOMED 2022 with SUS data | SNOMED 2022   | SNOMED 2022 with SUS data | SNOMED 2022   | SNOMED 2022 with SUS data | SNOMED 2022   | SNOMED 2022 with SUS data | SNOMED 2022   | SNOMED 2022 with SUS data | SNOMED 2022   | SNOMED 2022 with SUS data | SNOMED 2022   | SNOMED 2022 with SUS data | SNOMED 2022               | SNOMED 2022 with SUS data | SNOMED 2022             | SNOMED 2022 with SUS data | SNOMED 2022     | SNOMED 2022 with SUS data | SNOMED 2022   | SNOMED 2022 with SUS data | SNOMED 2022       | SNOMED 2022 with SUS data | SNOMED 2022      | SNOMED 2022 with SUS data | SNOMED 2022     | SNOMED 2022 with SUS data | SNOMED 2022    | SNOMED 2022 with SUS data |                        |               |
| all      | with records             | 690,425 (2.8)   | 765,870 (3.1)             | 499,570 (2.0) | 604,255 (2.4)             | 120,610 (0.5) | 139,900 (0.6)             | 397,825 (1.6) | 445,050 (1.8)             | 113,575 (0.5) | 132,025 (0.5)             | 369,315 (1.5) | 410,730 (1.6)             | 100,880 (0.4) | 116,705 (0.5)             | 82,660 (0.3)              | 105,695 (0.4)             | 68,980 (0.3)            | 80,555 (0.3)              | 78,945 (0.3)    | 99,505 (0.4)              | 137,400 (0.5) | 180,605 (0.7)             | 14,073,280 (56.1) | 16,948,545 (67.5)         | 109,280 (0.4)    | 121,220 (0.5)             | 2,286,050 (9.1) | 2,496,700 (9.9)           | 176,970 (0.7)  | 186,855 (0.7)             | 312,375 (1.2)          | 394,495 (1.6) |
| age band | 0-19                     | 123,800 (2.2)   | 169,220 (3.1)             | 142,275 (2.6) | 211,650 (3.8)             | 34,080 (0.6)  | 46,840 (0.9)              | 82,130 (1.5)  | 108,970 (2.0)             | 15,525 (0.3)  | 22,640 (0.4)              | 95,135 (1.7)  | 124,240 (2.3)             | 27,690 (0.5)  | 35,135 (0.6)              | 30,755 (0.6)              | 47,570 (0.9)              | 24,225 (0.4)            | 33,590 (0.6)              | 31,610 (0.6)    | 48,215 (0.9)              | 50,585 (0.9)  | 81,100 (1.5)              | 2,364,790 (42.9)  | 3,441,095 (62.5)          | 8,280 (0.2)      | 11,695 (0.2)              | 381,250 (6.9)   | 498,520 (9.0)             | 24,620 (0.4)   | 29,300 (0.5)              | 68,940 (1.3)           | 109,505 (2.0) |
|          | 20-29                    | 101,930 (3.3)   | 108,965 (3.5)             | 74,360 (2.4)  | 88,700 (2.8)              | 19,345 (0.6)  | 21,455 (0.7)              | 64,300 (2.1)  | 70,410 (2.3)              | 12,965 (0.4)  | 15,680 (0.5)              | 58,895 (1.9)  | 62,305 (2.0)              | 15,095 (0.5)  | 17,895 (0.6)              | 15,235 (0.5)              | 17,995 (0.6)              | 10,740 (0.3)            | 11,550 (0.4)              | 14,230 (0.5)    | 15,730 (0.5)              | 23,005 (0.7)  | 27,060 (0.9)              | 1,417,355 (45.3)  | 1,797,380 (57.5)          | 11,260 (0.4)     | 12,295 (0.4)              | 347,270 (11.1)  | 370,735 (11.9)            | 61,625 (2.0)   | 62,780 (2.0)              | 53,355 (1.7)           | 66,405 (2.1)  |
|          | 30-39                    | 153,680 (4.3)   | 160,435 (4.5)             | 99,185 (2.8)  | 108,270 (3.0)             | 24,670 (0.7)  | 26,230 (0.7)              | 85,920 (2.4)  | 91,280 (2.5)              | 16,155 (0.4)  | 18,255 (0.5)              | 70,220 (2.0)  | 73,295 (2.0)              | 16,110 (0.4)  | 17,970 (0.5)              | 14,355 (0.4)              | 16,150 (0.4)              | 11,510 (0.3)            | 11,990 (0.3)              | 12,810 (0.4)    | 13,770 (0.4)              | 25,720 (0.7)  | 28,840 (0.8)              | 1,772,795 (49.3)  | 2,041,980 (56.8)          | 16,765 (0.5)     | 17,705 (0.5)              | 560,950 (15.6)  | 584,915 (16.3)            | 33,710 (0.9)   | 34,775 (1.0)              | 70,895 (2.0)           | 81,630 (2.3)  |
|          | 40-49                    | 128,255 (4.0)   | 133,280 (4.1)             | 86,895 (2.7)  | 92,995 (2.9)              | 23,290 (0.7)  | 24,635 (0.8)              | 77,390 (2.4)  | 80,990 (2.5)              | 15,920 (0.5)  | 17,315 (0.5)              | 72,850 (2.3)  | 75,325 (2.3)              | 15,840 (0.5)  | 17,155 (0.5)              | 7,905 (0.2)               | 8,595 (0.3)               | 11,125 (0.3)            | 11,510 (0.4)              | 9,290 (0.3)     | 9,830 (0.3)               | 18,155 (0.6)  | 20,045 (0.6)              | 1,749,745 (54.2)  | 1,960,865 (60.7)          | 15,540 (0.5)     | 16,340 (0.5)              | 415,770 (9.8)   | 430,825 (13.3)            | 24,945 (0.8)   | 25,800 (0.8)              | 57,160 (1.8)           | 63,590 (2.0)  |
|          | 50-59                    | 76,600 (2.2)    | 80,550 (2.3)              | 47,805 (1.4)  | 50,855 (1.5)              | 10,960 (0.3)  | 11,735 (0.3)              | 46,665 (1.4)  | 49,070 (1.4)              | 23,330 (0.7)  | 25,530 (0.7)              | 46,385 (1.3)  | 48,305 (1.4)              | 15,690 (0.5)  | 17,025 (0.5)              | 7,800 (0.2)               | 8,320 (0.2)               | 6,840 (0.2)             | 7,130 (0.2)               | 6,140 (0.2)     | 6,560 (0.2)               | 11,115 (0.3)  | 12,690 (0.4)              | 2,266,255 (65.9)  | 2,540,685 (73.8)          | 17,620 (0.5)     | 18,925 (0.6)              | 255,685 (7.4)   | 267,650 (7.8)             | 16,005 (0.5)   | 16,745 (0.5)              | 32,830 (1.0)           | 37,525 (1.1)  |
|          | 60-69                    | 58,970 (2.2)    | 62,460 (2.3)              | 28,355 (1.0)  | 30,445 (1.1)              | 5,135 (0.2)   | 5,555 (0.2)               | 24,485 (0.9)  | 26,075 (1.0)              | 15,745 (0.6)  | 17,165 (0.6)              | 17,505 (0.6)  | 18,440 (0.7)              | 7,030 (0.3)   | 7,685 (0.3)               | 3,900 (0.1)               | 4,140 (0.2)               | 2,980 (0.1)             | 3,140 (0.1)               | 2,930 (0.1)     | 3,205 (0.1)               | 5,555 (0.2)   | 6,515 (0.2)               | 1,952,110 (71.2)  | 2,188,565 (79.8)          | 15,285 (0.6)     | 16,515 (0.6)              | 159,575 (5.8)   | 167,970 (6.1)             | 9,935 (0.4)    | 10,630 (0.4)              | 17,265 (0.6)           | 20,605 (0.8)  |
|          | 70-79                    | 31,840 (1.4)    | 34,180 (1.6)              | 12,275 (0.6)  | 13,220 (0.6)              | 1,875 (0.1)   | 2,065 (0.1)               | 12,300 (0.6)  | 13,180 (0.6)              | 6,565 (0.3)   | 7,195 (0.3)               | 5,920 (0.3)   | 6,255 (0.3)               | 2,260 (0.1)   | 2,515 (0.1)               | 1,475 (0.1)               | 1,580 (0.1)               | 1,160 (0.1)             | 1,220 (0.1)               | 1,375 (0.1)     | 1,550 (0.1)               | 2,280 (0.1)   | 2,935 (0.1)               | 1,663,155 (75.5)  | 1,889,605 (85.8)          | 15,065 (0.7)     | 16,635 (0.8)              | 105,165 (4.8)   | 111,065 (5.0)             | 4,385 (0.2)    | 4,850 (0.2)               | 8,400 (0.4)            | 10,440 (0.5)  |
|          | 80+                      | 15,355 (1.2)    | 16,785 (1.3)              | 7,425 (0.6)   | 8,120 (0.6)               | 1,255 (0.1)   | 1,410 (0.1)               | 4,635 (0.4)   | 5,075 (0.4)               | 7,370 (0.6)   | 8,245 (0.7)               | 2,400 (0.2)   | 2,570 (0.2)               | 1,160 (0.1)   | 1,335 (0.1)               | 1,230 (0.1)               | 1,335 (0.1)               | 400 (0.0)               | 425 (0.0)                 | 560 (0.0)       | 650 (0.1)                 | 975 (0.1)     | 1,415 (0.1)               | 887,065 (70.7)    | 1,088,360 (86.7)          | 9,465 (0.8)      | 11,105 (0.9)              | 60,385 (4.8)    | 65,015 (5.2)              | 1,740 (0.1)    | 1,975 (0.2)               | 3,530 (0.3)            | 4,795 (0.4)   |
| sex      | Female                   | 326,795 (2.6)   | 363,830 (2.9)             | 242,560 (1.9) | 293,875 (2.3)             | 57,715 (0.5)  | 67,620 (0.5)              | 200,910 (1.6) | 223,735 (1.8)             | 59,055 (0.5)  | 68,255 (0.5)              | 181,750 (1.5) | 202,745 (1.6)             | 50,205 (0.4)  | 57,485 (0.5)              | 42,970 (0.3)              | 54,485 (0.4)              | 34,340 (0.3)            | 40,070 (0.3)              | 40,000 (0.3)    | 50,140 (0.4)              | 69,370 (0.6)  | 89,685 (0.7)              | 7,252,300 (57.9)  | 8,666,365 (69.1)          | 54,965 (0.4)     | 61,080 (0.5)              | 1,153,810 (9.2) | 1,260,105 (10.1)          | 92,015 (0.7)   | 97,325 (0.8)              | 147,170 (1.2)          | 186,080 (1.5) |
|          | Male                     | 363,630 (2.9)   | 402,040 (3.2)             | 257,005 (2.0) | 310,380 (2.5)             | 62,895 (0.5)  | 72,300 (0.6)              | 196,915 (1.6) | 221,315 (1.8)             | 54,520 (0.4)  | 63,770 (0.5)              | 187,565 (1.5) | 207,990 (1.7)             | 50,675 (0.4)  | 59,220 (0.5)              | 39,690 (0.3)              | 51,205 (0.4)              | 34,640 (0.3)            | 40,485 (0.3)              | 38,945 (0.3)    | 49,365 (0.4)              | 68,025 (0.5)  | 90,920 (0.7)              | 6,820,980 (54.3)  | 8,282,180 (65.9)          | 54,315 (0.4)     | 60,140 (0.5)              | 1,132,240 (9.4) | 1,236,590 (9.8)           | 84,955 (0.7)   | 89,530 (0.7)              | 165,205 (1.3)          | 208,420 (1.7) |
| region   | East                     | 108,030 (1.9)   | 120,340 (2.1)             | 80,525 (1.4)  | 94,650 (1.6)              | 36,895 (0.6)  | 43,115 (0.7)              | 75,155 (1.3)  | 84,630 (1.5)              | 23,740 (0.4)  | 28,380 (0.5)              | 96,865 (1.7)  | 109,045 (1.9)             | 27,260 (0.5)  | 31,360 (0.5)              | 18,975 (0.3)              | 25,250 (0.4)              | 20,295 (0.3)            | 24,090 (0.4)              | 17,785 (0.3)    | 23,130 (0.4)              | 32,775 (0.6)  | 43,720 (0.8)              | 3,207,190 (10.7)  | 3,901,430 (67.2)          | 28,660 (0.5)     | 32,650 (0.6)              | 620,700 (10.7)  | 683,255 (11.8)            | 38,980 (0.7)   | 41,610 (0.7)              | 55,075 (0.9)           | 68,805 (1.2)  |
|          | East Midlands            | 200,645 (4.6)   | 224,035 (5.2)             | 50,290 (1.2)  | 58,690 (1.4)              | 13,355 (0.3)  | 15,670 (0.4)              | 55,155 (1.3)  | 61,890 (1.4)              | 18,280 (0.4)  | 21,695 (0.5)              | 63,970 (1.5)  | 71,285 (1.6)              | 15,070 (0.3)  | 17,695 (0.4)              | 18,405 (0.4)              | 24,435 (0.6)              | 10,760 (0.2)            | 12,700 (0.3)              | 13,030 (0.3)    | 16,530 (0.4)              | 18,795 (0.4)  | 28,235 (0.7)              | 2,491,890 (57.4)  | 2,976,340 (68.5)          | 14,410 (0.3)     | 16,095 (0.4)              | 361,140 (8.3)   | 394,435 (9.1)             | 24,830 (0.6)   | 26,205 (0.6)              | 43,050 (1.0)           | 54,200 (1.2)  |
|          | London                   | 173,335 (9.7)   | 188,780 (10.5)            | 51,010 (2.8)  | 56,005 (3.1)              | 17,725 (1.0)  | 19,475 (1.1)              | 126,490 (7.0) | 139,255 (7.8)             | 27,865 (1.6)  | 31,590 (1.8)              | 74,260 (4.1)  | 82,600 (4.6)              | 20,960 (1.2)  | 24,725 (1.4)              | 9,025 (0.5)               | 10,515 (0.6)              | 8,735 (0.5)             | 9,735 (0.5)               | 11,270 (0.6)    | 13,110 (0.7)              | 31,965 (1.8)  | 37,475 (2.1)              | 348,760 (19.4)    | 392,040 (21.8)            | 22,180 (1.2)     | 23,850 (1.3)              | 404,150 (22.5)  | 437,875 (24.4)            | 42,690 (2.4)   | 44,290 (2.5)              | 90,345 (5.0)           | 117,735 (6.6) |
|          | North East               | 8,640 (0.7)     | 9,720 (0.8)               | 25,385 (2.2)  | 31,835 (2.7)              | 2,610 (0.2)   | 3,260 (0.3)               | 11,860 (1.0)  | 13,675 (1.2)              | 2,675 (0.2)   | 3,270 (0.3)               | 14,750 (1.3)  | 16,560 (1.4)              | 2,525 (0.2)   | 3,160 (0.3)               | 3,445 (0.3)               | 4,600 (0.4)               | 2,750 (0.2)             | 3,305 (0.3)               | 3,110 (0.3)     | 4,175 (0.4)               | 4,160 (0.4)   | 6,095 (0.5)               | 742,000 (63.3)    | 902,025 (77.0)            | 2,655 (0.2)      | 3,020 (0.3)               | 66,585 (5.7)    | 72,405 (6.2)              | 6,545 (0.6)    | 7,065 (0.6)               | 14,395 (1.2)           | 19,430 (1.7)  |
|          | North West               | 23,000 (1.1)    | 25,160 (1.2)              | 21,165 (1.0)  | 25,745 (1.2)              | 6,705 (0.3)   | 7,975 (0.4)               | 17,280 (0.8)  | 19,865 (0.9)              | 1,135 (0.1)   | 1,260 (0.1)               | 13,410 (0.6)  | 14,960 (0.7)              | 2,925 (0.1)   | 3,495 (0.2)               | 1,530 (0.1)               | 2,025 (0.1)               | 2,980 (0.1)             | 3,675 (0.2)               | 3,995 (0.2)     | 5,380 (0.2)               | 5,920 (0.3)   | 7,985 (0.4)               | 1,462,975 (67.8)  | 1,769,575 (82.0)          | 5,300 (0.2)      | 5,835 (0.3)               | 101,985 (4.7)   | 107,465 (5.0)             | 9,635 (0.4)    | 10,390 (0.5)              | 13,900 (0.6)           | 18,975 (0.9)  |
|          | South East               | 21,610 (1.3)    | 23,470 (1.4)              | 9,420 (0.6)   | 10,780 (0.7)              | 7,455 (0.5)   | 8,425 (0.5)               | 21,190 (1.3)  | 23,495 (1.4)              | 2,825 (0.2)   | 3,085 (0.2)               | 16,005 (1.0)  | 17,215 (1.0)              | 4,675 (0.3)   | 5,255 (0.3)               | 3,385 (0.2)               | 4,015 (0.2)               | 4,635 (0.3)             | 5,365 (0.3)               | 5,805 (0.4)     | 6,805 (0.4)               | 9,990 (0.6)   | 12,170 (0.7)              | 963,370 (58.6)    | 1,169,575 (71.1)          | 7,740 (0.5)      | 8,565 (0.5)               | 157,435 (9.6)   | 170,525 (10.4)            | 10,125 (0.6)   | 10,660 (0.6)              | 20,345 (1.2)           | 23,400 (1.4)  |
|          | South West               | 33,820 (1.0)    | 36,535 (1.0)              | 4,945 (0.1)   | 5,535 (0.2)               | 5,095 (0.1)   | 5,935 (0.2)               | 27,940 (0.8)  | 30,595 (0.9)              | 4,815 (0.1)   | 5,555 (0.2)               | 15,330 (0.4)  | 16,685 (0.5)              | 5,590 (0.2)   | 6,485 (0.2)               | 7,080 (0.2)               | 8,780 (0.3)               | 5,790 (0.2)             | 6,845 (0.2)               | 8,515 (0.2)     | 10,420 (0.3)              | 12,570 (0.4)  | 16,925 (0.5)              | 2,256,880 (64.8)  | 2,729,835 (78.4)          | 11,385 (0.3)     | 12,675 (0.4)              | 261,570 (7.5)   | 284,000 (8.2)             | 15,010 (0.4)   | 15,935 (0.5)              | 21,635 (0.6)           | 26,855 (0.8)  |
|          | West Midlands            | 65,260 (6.4)    | 73,425 (7.2)              | 70,250 (6.9)  | 77,920 (7.6)              | 15,380 (1.5)  | 17,375 (1.7)              | 23,485 (2.3)  | 25,695 (2.5)              | 22,860 (2.2)  | 26,040 (2.6)              | 31,365 (3.1)  | 33,885 (3.3)              | 11,175 (1.1)  | 12,265 (1.2)              | 11,545 (1.1)              | 13,395 (1.3)              | 3,830 (0.4)             | 4,160 (0.4)               | 5,390 (0.5)     | 6,060 (0.6)               | 8,460 (0.8)   | 9,820 (1.0)               | 461,205 (45.3)    | 530,980 (52.1)            | 6,655 (0.7)      | 7,150 (0.7)               | 72,325 (7.1)    | 77,690 (7.6)              | 10,710 (1.1)   | 11,205 (1.1)              | 17,345 (1.7)           | 20,605 (2.0)  |
|          | Yorkshire and The Humber | 54,790 (1.5)    | 62,915 (1.7)              | 185,960 (5.1) | 242,270 (6.7)             | 15,340 (0.4)  | 18,625 (0.5)              | 38,840 (1.1)  | 45,415 (1.2)              | 9,200 (0.3)   | 10,910 (0.3)              | 42,505 (1.2)  | 47,490 (1.3)              | 10,490 (0.3)  | 11,980 (0.3)              | 8,965 (0.2)               | 12,230 (0.3)              | 8,900 (0.2)             | 10,325 (0.3)              | 9,895 (0.3)     | 13,665 (0.4)              | 12,675 (0.3)  | 17,850 (0.5)              | 2,118,540 (58.2)  | 2,552,035 (70.1)          | 10,160 (0.3)     | 11,235 (0.3)              | 236,545 (6.5)   | 264,945 (7.3)             | 18,300 (0.5)   | 19,335 (0.5)              | 35,835 (1.0)           | 43,900 (1.2)  |
|          | IMD                      | 1 Most deprived | 137,995 (2.8)             | 152,740 (3.1) | 257,880 (5.2)             | 314,575 (6.3) | 54,780 (1.1)              | 63,695 (1.3)  | 101,605 (2.1)             | 115,695 (2.3) | 44,070 (0.9)              | 51,275 (1.0)  | 152,360 (3.1)             | 169,330 (3.4) | 35,940 (0.7)              | 41,805 (0.8)              | 27,090 (0.5)              | 34,760 (0.7)            | 22,300 (0.4)              | 25,555 (0.5)    | 17,080 (0.3)              | 21,885 (0.4)  | 33,620 (0.7)              | 44,835 (0.9)      | 2,329,005 (46.9)          | 2,848,830 (57.3) | 17,825 (0.4)              | 19,570 (0.4)    | 535,420 (10.8)            | 584,140 (11.8) | 24,690 (0.5)              | 26,285 (0.5)           | 93,600 (1.9)  |
| 2        |                          | 210,115 (4.3)   | 231,525 (4.8)             | 115,185 (2.4) | 138,270 (2.8)             | 31,380 (0.6)  | 36,080 (0.7)              | 103,580 (2.1) | 115,590 (2.4)             | 27,995 (0.6)  | 32,675 (0.7)              | 90,415 (1.9)  | 100,355 (2.1)             | 24,830 (0.5)  | 28,865 (0.6)              | 18,200 (0.4)              | 23,165 (0.5)              | 15,330 (0.3)            | 17,890 (0.4)              | 15              |                           |               |                           |                   |                           |                  |                           |                 |                           |                |                           |                        |               |
