# Supplementary material for: Consistency, completeness and external validity of ethnicity recording in NHS primary care records: a cohort study in 25 million patients’ records at source using OpenSAFELY
Source: bioRxiv or medRxiv preprint supplement (doi:10.1101/2023.11.21.23298690), 2023-11-22
Supplement: Supplementary file [file media-4.pdf]

Table 4: Count of patients' most frequently recorded ethnicity (proportion of latest ethnicity).

| Latest Recorded Ethnicity | Most Frequent Ethnicity |                |                |                   |                |
|---------------------------|-------------------------|----------------|----------------|-------------------|----------------|
|                           | Asian                   | Black          | Mixed          | White             | Other          |
| Asian                     | 1,695,745 (99.3)        | 1,165 (0.1)    | 1,995 (0.1)    | 4,690 (0.3)       | 4,835 (0.3)    |
| Black                     | 4,380 (0.8)             | 569,290 (97.5) | 3,825 (0.7)    | 5,450 (0.9)       | 825 (0.1)      |
| Mixed                     | 15,155 (4.1)            | 26,300 (7.1)   | 309,220 (84.0) | 15,080 (4.1)      | 2,225 (0.6)    |
| White                     | 23,975 (0.1)            | 16,845 (0.1)   | 32,920 (0.2)   | 16,390,425 (99.5) | 4,445 (0.0)    |
| Other                     | 23,970 (4.9)            | 6,825 (1.4)    | 9,520 (1.9)    | 49,600 (10.1)     | 399,440 (81.6) |
