# Supplementary material for: Consistency, completeness and external validity of ethnicity recording in NHS primary care records: a cohort study in 25 million patients’ records at source using OpenSAFELY
Source: bioRxiv or medRxiv preprint supplement (doi:10.1101/2023.11.21.23298690), 2023-11-22
Supplement: Supplementary file [file media-5.pdf]

Table 5: Count of patients with a recorded ethnicity in Secondary Care by ethnicity group (proportion of Primary Care population). All counts are rounded to the nearest 5.

| Primary Care ethnicity | Secondary Care ethnicity |                |               |                  |               |                  |
|------------------------|--------------------------|----------------|---------------|------------------|---------------|------------------|
|                        | Asian                    | Black          | Mixed         | White            | Other         | Unknown          |
| Asian (1,708,430)      | 822,555 (48.1)           | 6,935 (0.4)    | 23,025 (1.3)  | 37,000 (2.2)     | 85,035 (5)    | 733,885 (43)     |
| Black (583,770)        | 9,080 (1.6)              | 249,215 (42.7) | 23,625 (4)    | 22,660 (3.9)     | 27,875 (4.8)  | 251,315 (43.1)   |
| Mixed (367,980)        | 19,015 (5.2)             | 34,550 (9.4)   | 75,460 (20.5) | 62,030 (16.9)    | 25,640 (7)    | 151,280 (41.1)   |
| White (16,468,610)     | 39,165 (0.2)             | 29,200 (0.2)   | 105,610 (0.6) | 10,871,855 (66)  | 173,795 (1.1) | 5,248,985 (31.9) |
| Other (489,350)        | 32,475 (6.6)             | 6,980 (1.4)    | 12,575 (2.6)  | 59,635 (12.2)    | 91,125 (18.6) | 286,555 (58.6)   |
| Unknown (5,484,075)    | 246,665 (4.5)            | 75,645 (1.4)   | 98,240 (1.8)  | 3,098,030 (56.5) | 92,050 (1.7)  | 1,873,455 (34.2) |
