# Supplementary material for: Consistency, completeness and external validity of ethnicity recording in NHS primary care records: a cohort study in 25 million patients’ records at source using OpenSAFELY
Source: bioRxiv or medRxiv preprint supplement (doi:10.1101/2023.11.21.23298690), 2023-11-22
Supplement: Supplementary file [file media-6.pdf]

Table 6: Count of patients with a recorded ethnicity in Secondary Care by ethnicity group excluding Unknown ethnicities (proportion of Primary Care population). All counts are rounded to the nearest 5.

| Primary Care ethnicity | Secondary Care ethnicity |                |               |                 |               |
|------------------------|--------------------------|----------------|---------------|-----------------|---------------|
|                        | Asian                    | Black          | Mixed         | White           | Other         |
| Asian (1,708,430)      | 822,555 (48.1)           | 6,935 (0.4)    | 23,025 (1.3)  | 37,000 (2.2)    | 85,035 (5)    |
| Black (583,770)        | 9,080 (1.6)              | 249,215 (42.7) | 23,625 (4)    | 22,660 (3.9)    | 27,875 (4.8)  |
| Mixed (367,980)        | 19,015 (5.2)             | 34,550 (9.4)   | 75,460 (20.5) | 62,030 (16.9)   | 25,640 (7)    |
| White (16,468,610)     | 39,165 (0.2)             | 29,200 (0.2)   | 105,610 (0.6) | 10,871,855 (66) | 173,795 (1.1) |
| Other (489,350)        | 32,475 (6.6)             | 6,980 (1.4)    | 12,575 (2.6)  | 59,635 (12.2)   | 91,125 (18.6) |
