# Supplementary material for: Consistency, completeness and external validity of ethnicity recording in NHS primary care records: a cohort study in 25 million patients’ records at source using OpenSAFELY
Source: bioRxiv or medRxiv preprint supplement (doi:10.1101/2023.11.21.23298690), 2023-11-22
Supplement: Supplementary file [file media-7.pdf]

Table 7: Count of patients with a recorded ethnicity in OpenSAFELY TPP by ethnicity group (proportion of registered TPP population) and 2021 ONS Census counts [amended to 2001 grouping] (proportion of 2021 ONS Census population). All counts are rounded to the nearest 5.

|                          | Asian               |                           |                                            | Black             |                           |                                            | Mixed             |                           |                                            | White                 |                           |                                            | Other             |                           |                                            |
|--------------------------|---------------------|---------------------------|--------------------------------------------|-------------------|---------------------------|--------------------------------------------|-------------------|---------------------------|--------------------------------------------|-----------------------|---------------------------|--------------------------------------------|-------------------|---------------------------|--------------------------------------------|
|                          | SNOMED 2022         | SNOMED 2022 with SUS data | 2021 ONS Census [amended to 2001 grouping] | SNOMED 2022       | SNOMED 2022 with SUS data | 2021 ONS Census [amended to 2001 grouping] | SNOMED 2022       | SNOMED 2022 with SUS data | 2021 ONS Census [amended to 2001 grouping] | SNOMED 2022           | SNOMED 2022 with SUS data | 2021 ONS Census [amended to 2001 grouping] | SNOMED 2022       | SNOMED 2022 with SUS data | 2021 ONS Census [amended to 2001 grouping] |
| England                  | 1,708,430<br>(8.71) | 1,955,095<br>(8.42)       | 4,995,225<br>(8.84)                        | 583,770<br>(2.98) | 659,410<br>(2.84)         | 2,381,720<br>(4.22)                        | 367,980<br>(1.88) | 466,220<br>(2.01)         | 1,669,380<br>(2.96)                        | 16,468,610<br>(83.95) | 19,566,635<br>(84.23)     | 45,783,400<br>(81.05)                      | 489,350<br>(2.49) | 581,395<br>(2.5)          | 1,660,315<br>(2.94)                        |
| East Midlands            | 319,445<br>(9.36)   | 360,305<br>(8.96)         | 368,130<br>(7.54)                          | 97,320<br>(2.85)  | 110,695<br>(2.75)         | 129,985<br>(2.66)                          | 60,985<br>(1.79)  | 81,860<br>(2.04)          | 117,245<br>(2.4)                           | 2,867,445<br>(84.01)  | 3,386,935<br>(84.25)      | 4,179,775<br>(85.65)                       | 67,880<br>(1.99)  | 80,350 (2)                | 84,915<br>(1.74)                           |
| East of England          | 300,605<br>(6.7)    | 342,735<br>(6.4)          | 367,425<br>(5.8)                           | 147,865<br>(3.29) | 168,770<br>(3.15)         | 184,950<br>(2.92)                          | 89,825 (2)        | 116,180<br>(2.17)         | 179,655<br>(2.84)                          | 3,856,555<br>(85.91)  | 4,617,355<br>(86.22)      | 5,478,365<br>(86.48)                       | 94,055<br>(2.1)   | 110,425<br>(2.06)         | 124,675<br>(1.97)                          |
| London                   | 368,555<br>(25.23)  | 403,495<br>(24.77)        | 1,670,120<br>(18.98)                       | 123,080<br>(8.43) | 138,875<br>(8.53)         | 1,188,370<br>(13.5)                        | 60,995<br>(4.18)  | 70,810<br>(4.35)          | 505,775<br>(5.75)                          | 775,090<br>(53.06)    | 853,735<br>(52.41)        | 4,731,170<br>(53.76)                       | 133,035<br>(9.11) | 162,100<br>(9.95)         | 704,290 (8)                                |
| North East               | 48,500<br>(5.31)    | 58,495<br>(5.3)           | 83,605<br>(3.16)                           | 19,950<br>(2.18)  | 22,990<br>(2.08)          | 26,635<br>(1.01)                           | 13,465<br>(1.47)  | 18,160<br>(1.65)          | 33,270<br>(1.26)                           | 811,235<br>(88.75)    | 977,415<br>(88.57)        | 2,462,720<br>(93.04)                       | 20,940<br>(2.29)  | 26,485<br>(2.4)           | 40,785<br>(1.54)                           |
| North West               | 68,150<br>(4.02)    | 78,725<br>(3.88)          | 568,635<br>(7.67)                          | 17,470<br>(1.03)  | 19,705<br>(0.97)          | 173,920<br>(2.34)                          | 14,420<br>(0.85)  | 19,055<br>(0.94)          | 163,245<br>(2.2)                           | 1,570,265<br>(92.7)   | 1,882,895<br>(92.77)      | 6,347,395<br>(85.57)                       | 23,535<br>(1.39)  | 29,350<br>(1.45)          | 164,205<br>(2.21)                          |
| South East               | 59,670<br>(4.71)    | 66,180<br>(4.4)           | 586,215<br>(6.32)                          | 23,510<br>(1.86)  | 25,550<br>(1.7)           | 221,585<br>(2.39)                          | 23,715<br>(1.87)  | 28,355<br>(1.89)          | 260,870<br>(2.81)                          | 1,128,545<br>(89.15)  | 1,348,710<br>(89.74)      | 8,009,380<br>(86.33)                       | 30,470<br>(2.41)  | 34,070<br>(2.27)          | 200,010<br>(2.16)                          |
| South West               | 71,795<br>(2.66)    | 78,600<br>(2.44)          | 132,670<br>(2.33)                          | 25,735<br>(0.95)  | 28,730<br>(0.89)          | 69,615<br>(1.22)                           | 33,950<br>(1.26)  | 42,945<br>(1.33)          | 114,075 (2)                                | 2,529,835<br>(93.77)  | 3,026,520<br>(94)         | 5,309,610<br>(93.13)                       | 36,640<br>(1.36)  | 42,795<br>(1.33)          | 75,220<br>(1.32)                           |
| West Midlands            | 174,370<br>(20.83)  | 194,405<br>(20.51)        | 760,965<br>(12.79)                         | 65,400<br>(7.81)  | 72,195<br>(7.62)          | 269,020<br>(4.52)                          | 29,220<br>(3.49)  | 33,420<br>(3.53)          | 178,225<br>(2.99)                          | 540,185<br>(64.52)    | 615,885<br>(64.99)        | 4,585,025<br>(77.05)                       | 28,055<br>(3.35)  | 31,815<br>(3.36)          | 157,525<br>(2.65)                          |
| Yorkshire and the Humber | 294,930<br>(10.47)  | 369,235<br>(10.91)        | 457,465<br>(8.35)                          | 62,195<br>(2.21)  | 70,370<br>(2.08)          | 117,645<br>(2.15)                          | 40,435<br>(1.44)  | 54,080<br>(1.6)           | 117,015<br>(2.14)                          | 2,365,245<br>(83.97)  | 2,828,245<br>(83.55)      | 4,679,965<br>(85.39)                       | 54,135<br>(1.92)  | 63,245<br>(1.87)          | 108,685<br>(1.98)                          |
