# Supplementary material for: Consistency, completeness and external validity of ethnicity recording in NHS primary care records: a cohort study in 25 million patients’ records at source using OpenSAFELY
Source: bioRxiv or medRxiv preprint supplement (doi:10.1101/2023.11.21.23298690), 2023-11-22
Supplement: Supplementary file [file media-8.pdf]

Table 8: Count of patients with a recorded ethnicity in OpenSAFELY TPP [amended to the 2021 ethnicity grouping] (proportion of registered TPP population) and 2021 ONS Census counts (proportion of 2021 ONS Census population). All counts are rounded to the nearest 5.

|                          | Asian                                         |                                                             |                        | Black                                         |                                                             |                        | Mixed                                         |                                                             |                        | White                                         |                                                             |                        | Other                                         |                                                             |                        |
|--------------------------|-----------------------------------------------|-------------------------------------------------------------|------------------------|-----------------------------------------------|-------------------------------------------------------------|------------------------|-----------------------------------------------|-------------------------------------------------------------|------------------------|-----------------------------------------------|-------------------------------------------------------------|------------------------|-----------------------------------------------|-------------------------------------------------------------|------------------------|
|                          | <b>SNOMED 2022 (amended to 2021 grouping)</b> | <b>SNOMED 2022 with SUS data (amended to 2021 grouping)</b> | <b>2021 ONS Census</b> | <b>SNOMED 2022 (amended to 2021 grouping)</b> | <b>SNOMED 2022 with SUS data (amended to 2021 grouping)</b> | <b>2021 ONS Census</b> | <b>SNOMED 2022 (amended to 2021 grouping)</b> | <b>SNOMED 2022 with SUS data (amended to 2021 grouping)</b> | <b>2021 ONS Census</b> | <b>SNOMED 2022 (amended to 2021 grouping)</b> | <b>SNOMED 2022 with SUS data (amended to 2021 grouping)</b> | <b>2021 ONS Census</b> | <b>SNOMED 2022 (amended to 2021 grouping)</b> | <b>SNOMED 2022 with SUS data (amended to 2021 grouping)</b> | <b>2021 ONS Census</b> |
| England                  | 1,885,400 (9.61)                              | 2,141,950 (9.22)                                            | 5,426,390 (9.61)       | 583,770 (2.98)                                | 659,460 (2.84)                                              | 2,381,720 (4.22)       | 367,985 (1.88)                                | 466,360 (2.01)                                              | 1,669,380 (2.96)       | 16,468,610 (83.95)                            | 19,566,465 (84.23)                                          | 45,783,400 (81.05)     | 312,375 (1.59)                                | 394,495 (1.7)                                               | 1,229,150 (2.18)       |
| East Midlands            | 344,275 (10.09)                               | 386,490 (9.61)                                              | 391,105 (8.01)         | 97,320 (2.85)                                 | 110,675 (2.75)                                              | 129,985 (2.66)         | 60,990 (1.79)                                 | 81,900 (2.04)                                               | 117,245 (2.4)          | 2,867,440 (84.01)                             | 3,386,870 (84.25)                                           | 4,179,775 (85.65)      | 43,050 (1.26)                                 | 54,200 (1.35)                                               | 61,945 (1.27)          |
| East of England          | 339,585 (7.56)                                | 384,345 (7.18)                                              | 405,870 (6.41)         | 147,865 (3.29)                                | 168,785 (3.15)                                              | 184,950 (2.92)         | 89,830 (2)                                    | 116,190 (2.17)                                              | 179,655 (2.84)         | 3,856,550 (85.91)                             | 4,617,335 (86.22)                                           | 5,478,365 (86.48)      | 55,075 (1.23)                                 | 68,805 (1.28)                                               | 86,230 (1.36)          |
| London                   | 411,250 (28.15)                               | 447,805 (27.49)                                             | 1,817,640 (20.66)      | 123,085 (8.43)                                | 138,915 (8.53)                                              | 1,188,370 (13.5)       | 60,995 (4.18)                                 | 70,835 (4.35)                                               | 505,775 (5.75)         | 775,090 (53.06)                               | 853,765 (52.41)                                             | 4,731,170 (53.76)      | 90,345 (6.18)                                 | 117,735 (7.23)                                              | 556,770 (6.33)         |
| North East               | 55,040 (6.02)                                 | 65,555 (5.94)                                               | 98,045 (3.7)           | 19,950 (2.18)                                 | 22,990 (2.08)                                               | 26,635 (1.01)          | 13,465 (1.47)                                 | 18,175 (1.65)                                               | 33,270 (1.26)          | 811,240 (88.75)                               | 977,450 (88.57)                                             | 2,462,720 (93.04)      | 14,395 (1.57)                                 | 19,430 (1.76)                                               | 26,340 (1)             |
| North West               | 77,785 (4.59)                                 | 89,135 (4.39)                                               | 622,685 (8.39)         | 17,470 (1.03)                                 | 19,715 (0.97)                                               | 173,920 (2.34)         | 14,425 (0.85)                                 | 19,065 (0.94)                                               | 163,245 (2.2)          | 1,570,260 (92.7)                              | 1,882,875 (92.76)                                           | 6,347,395 (85.57)      | 13,900 (0.82)                                 | 18,975 (0.93)                                               | 110,155 (1.49)         |
| South East               | 69,800 (5.51)                                 | 76,830 (5.11)                                               | 650,545 (7.01)         | 23,505 (1.86)                                 | 25,555 (1.7)                                                | 221,585 (2.39)         | 23,715 (1.87)                                 | 28,355 (1.89)                                               | 260,870 (2.81)         | 1,128,545 (89.15)                             | 1,348,665 (89.74)                                           | 8,009,380 (86.33)      | 20,345 (1.61)                                 | 23,400 (1.56)                                               | 135,685 (1.46)         |
| South West               | 86,810 (3.22)                                 | 94,535 (2.94)                                               | 159,185 (2.79)         | 25,735 (0.95)                                 | 28,725 (0.89)                                               | 69,615 (1.22)          | 33,955 (1.26)                                 | 42,970 (1.33)                                               | 114,075 (2)            | 2,529,835 (93.77)                             | 3,026,510 (94)                                              | 5,309,610 (93.13)      | 21,635 (0.8)                                  | 26,855 (0.83)                                               | 48,705 (0.85)          |
| West Midlands            | 185,085 (22.11)                               | 205,620 (21.7)                                              | 794,265 (13.35)        | 65,400 (7.81)                                 | 72,190 (7.62)                                               | 269,020 (4.52)         | 29,225 (3.49)                                 | 33,435 (3.53)                                               | 178,225 (2.99)         | 540,185 (64.52)                               | 615,820 (64.98)                                             | 4,585,025 (77.05)      | 17,345 (2.07)                                 | 20,605 (2.17)                                               | 124,225 (2.09)         |
| Yorkshire and the Humber | 313,230 (11.12)                               | 388,560 (11.48)                                             | 487,055 (8.89)         | 62,195 (2.21)                                 | 70,380 (2.08)                                               | 117,645 (2.15)         | 40,435 (1.44)                                 | 54,070 (1.6)                                                | 117,015 (2.14)         | 2,365,245 (83.97)                             | 2,828,215 (83.55)                                           | 4,679,965 (85.39)      | 35,835 (1.27)                                 | 43,900 (1.3)                                                | 79,095 (1.44)          |
