# Supplementary material for: Consistency, completeness and external validity of ethnicity recording in NHS primary care records: a cohort study in 25 million patients’ records at source using OpenSAFELY
Source: bioRxiv or medRxiv preprint supplement (doi:10.1101/2023.11.21.23298690), 2023-11-22
Supplement: Supplementary file [file media-9.pdf]

Table 9: Count of individual ethnicity code use

| Code            | Term                                                                                                                                      | Count  |
|-----------------|-------------------------------------------------------------------------------------------------------------------------------------------|--------|
| 92491000000104  | African - ethnic category 2001 census                                                                                                     | 369350 |
| 978231000000100 | African: African, African Scottish or African British - Scotland ethnic category 2011 census                                              | 535    |
| 978251000000107 | African: any other African - Scotland ethnic category 2011 census                                                                         | 195    |
| 413465009       | Afro-Caribbean                                                                                                                            | 1435   |
| 413466005       | Afro-Caucasian                                                                                                                            | 90     |
| 88971000000106  | Albanian - ethnic category 2001 census                                                                                                    | 10245  |
| 94151000000105  | Any other group - ethnic category 2001 census                                                                                             | 44060  |
| 89001000000105  | Arab - ethnic category 2001 census                                                                                                        | 53120  |
| 90027003        | Arabs                                                                                                                                     | 2990   |
| 315280000       | Asian - ethnic group                                                                                                                      | 81595  |
| 92611000000106  | Asian and Chinese - ethnic category 2001 census                                                                                           | 5680   |
| 976831000000100 | Asian or Asian British: Bangladeshi - England and Wales ethnic category 2011 census                                                       | 4605   |
| 977731000000108 | Asian or Asian British: Bangladeshi - Northern Ireland ethnic category 2011 census                                                        | 600    |
| 976851000000107 | Asian or Asian British: Chinese - England and Wales ethnic category 2011 census                                                           | 5405   |
| 977751000000101 | Asian or Asian British: Chinese - Northern Ireland ethnic category 2011 census                                                            | 260    |
| 976791000000107 | Asian or Asian British: Indian - England and Wales ethnic category 2011 census                                                            | 32355  |
| 977591000000103 | Asian or Asian British: Indian - Northern Ireland ethnic category 2011 census                                                             | 5975   |
| 976811000000108 | Asian or Asian British: Pakistani - England and Wales ethnic category 2011 census                                                         | 17915  |
| 977711000000100 | Asian or Asian British: Pakistani - Northern Ireland ethnic category 2011 census                                                          | 2790   |
| 976871000000103 | Asian or Asian British: any other Asian background - England and Wales ethnic category 2011 census                                        | 13365  |
| 977771000000105 | Asian or Asian British: any other Asian background - Northern Ireland ethnic category 2011 census                                         | 1110   |
| 978171000000105 | Asian or Asian Scottish or Asian British: Bangladeshi, Bangladeshi Scottish or Bangladeshi British - Scotland ethnic category 2011 census | 185    |
| 978191000000109 | Asian or Asian Scottish or Asian British: Chinese - Scotland ethnic category 2011 census                                                  | 60     |
| 978111000000100 | Asian or Asian Scottish or Asian British: Indian, Indian Scottish or Indian British - Scotland ethnic category 2011 census                | 1545   |
| 978071000000106 | Asian or Asian Scottish or Asian British: Pakistani, Pakistani Scottish or Pakistani British - Scotland ethnic category 2011 census       | 1080   |
| 978211000000108 | Asian or Asian Scottish or Asian British: any other Asian group - Scotland ethnic category 2011 census                                    | 310    |
| 88951000000102  | Baltic States (Estonian or Latvian or Lithuanian) - ethnic category 2001 census                                                           | 86330  |
| 186003008       | Bangladeshi                                                                                                                               | 29650  |

Table 9: Count of individual ethnicity code use

|                 |                                                                                                                           |        |
|-----------------|---------------------------------------------------------------------------------------------------------------------------|--------|
| 92471000000103  | Bangladeshi or British Bangladeshi - ethnic category 2001 census                                                          | 124530 |
| 315240009       | Black - ethnic group                                                                                                      | 16180  |
| 185993005       | Black - other African country                                                                                             | 1425   |
| 185996002       | Black - other Asian                                                                                                       | 820    |
| 185998001       | Black - other, mixed                                                                                                      | 4230   |
| 18167009        | Black African                                                                                                             | 135180 |
| 315635008       | Black African and White                                                                                                   | 8365   |
| 275587000       | Black Arab                                                                                                                | 455    |
| 185990008       | Black British                                                                                                             | 17280  |
| 110791000000100 | Black British - ethnic category 2001 census                                                                               | 31880  |
| 185988007       | Black Caribbean                                                                                                           | 32445  |
| 315634007       | Black Caribbean and White                                                                                                 | 12520  |
| 270460000       | Black Caribbean/West India/Guyana                                                                                         | 4155   |
| 275589002       | Black East African Asian                                                                                                  | 185    |
| 270462008       | Black East African Asian/Indo-Caribbean                                                                                   | 255    |
| 309644006       | Black Guyana                                                                                                              | 105    |
| 185995003       | Black Indian sub-continent                                                                                                | 310    |
| 275590006       | Black Indo-Caribbean                                                                                                      | 55     |
| 275588005       | Black Iranian                                                                                                             | 100    |
| 270461001       | Black N African/Arab/Iranian                                                                                              | 630    |
| 275586009       | Black North African                                                                                                       | 270    |
| 309643000       | Black West Indian                                                                                                         | 600    |
| 92581000000100  | Black and Asian - ethnic category 2001 census                                                                             | 1210   |
| 92591000000103  | Black and Chinese - ethnic category 2001 census                                                                           | 115    |
| 110771000000104 | Black and White - ethnic category 2001 census                                                                             | 3000   |
| 976891000000104 | Black or African or Caribbean or Black British: African - England and Wales ethnic category 2011 census                   | 12425  |
| 977791000000109 | Black or African or Caribbean or Black British: African - Northern Ireland ethnic category 2011 census                    | 620    |
| 976911000000101 | Black or African or Caribbean or Black British: Caribbean - England and Wales ethnic category 2011 census                 | 5790   |
| 977811000000105 | Black or African or Caribbean or Black British: Caribbean - Northern Ireland ethnic category 2011 census                  | 315    |
| 976931000000109 | Black or African or Caribbean or Black British: other Black or African or Caribbean background - England and Wales ethnic | 3870   |

Table 9: Count of individual ethnicity code use

|                 | category 2011 census                                                                                                                          |         |
|-----------------|-----------------------------------------------------------------------------------------------------------------------------------------------|---------|
| 977831000000102 | Black or African or Caribbean or Black British: other Black or African or Caribbean background - Northern Ireland ethnic category 2011 census | 600     |
| 185989004       | Black, other, non-mixed origin                                                                                                                | 2750    |
| 93991000000103  | Bosnian - ethnic category 2001 census                                                                                                         | 800     |
| 92681000000104  | British Asian - ethnic category 2001 census                                                                                                   | 26100   |
| 186006000       | British ethnic minority specified (NMO)                                                                                                       | 430     |
| 186007009       | British ethnic minority unspecified (NMO)                                                                                                     | 665     |
| 92391000000108  | British or mixed British - ethnic category 2001 census                                                                                        | 9407055 |
| 29343004        | Bulgarian                                                                                                                                     | 11685   |
| 718962008       | Bulgarian Roma                                                                                                                                | 115     |
| 107691000000105 | Caribbean - ethnic category 2001 census                                                                                                       | 112475  |
| 92691000000102  | Caribbean Asian - ethnic category 2001 census                                                                                                 | 535     |
| 270463003       | Caribbean I./W.I./Guyana (NMO)                                                                                                                | 155     |
| 275591005       | Caribbean Island (NMO)                                                                                                                        | 280     |
| 978341000000102 | Caribbean or Black: Black, Black Scottish or Black British - Scotland ethnic category 2011 census                                             | 110     |
| 978271000000103 | Caribbean or Black: Caribbean, Caribbean Scottish or Caribbean British - Scotland ethnic category 2011 census                                 | 145     |
| 978361000000101 | Caribbean or Black: any other Black or Caribbean group - Scotland ethnic category 2011 census                                                 | 110     |
| 413773004       | Caucasian (racial group)                                                                                                                      | 12335   |
| 33897005        | Chinese                                                                                                                                       | 48705   |
| 92511000000107  | Chinese - ethnic category 2001 census                                                                                                         | 197525  |
| 92601000000109  | Chinese and White - ethnic category 2001 census                                                                                               | 2445    |
| 88961000000104  | Commonwealth of (Russian) Independent States - ethnic category 2001 census                                                                    | 7325    |
| 186040000       | Cook Island Maori                                                                                                                             | 25      |
| 92571000000102  | Cornish - ethnic category 2001 census                                                                                                         | 10390   |
| 94001000000108  | Croatian - ethnic category 2001 census                                                                                                        | 1525    |
| 92791000000109  | Cypriot (part not stated) - ethnic category 2001 census                                                                                       | 1645    |
| 286009          | Czech                                                                                                                                         | 7000    |
| 718959005       | Czech Roma                                                                                                                                    | 115     |
| 270465005       | E Afric Asian/Indo-Carib (NMO)                                                                                                                | 105     |
| 275596000       | East African Asian (NMO)                                                                                                                      | 295     |

Table 9: Count of individual ethnicity code use

|                 |                                                                |        |
|-----------------|----------------------------------------------------------------|--------|
| 92661000000108  | East African Asian - ethnic category 2001 census               | 1840   |
| 110761000000106 | English - ethnic category 2001 census                          | 387530 |
| 69865008        | Fijian                                                         | 520    |
| 92771000000105  | Filipino - ethnic category 2001 census                         | 16010  |
| 275599007       | Greek (NMO)                                                    | 1570   |
| 93931000000104  | Greek - ethnic category 2001 census                            | 11685  |
| 275600005       | Greek Cypriot (NMO)                                            | 400    |
| 93941000000108  | Greek Cypriot - ethnic category 2001 census                    | 2590   |
| 270466006       | Greek/Greek Cypriot (NMO)                                      | 480    |
| 275593008       | Guyana (NMO)                                                   | 95     |
| 40182006        | Gypsies                                                        | 530    |
| 88931000000109  | Gypsy/Romany - ethnic category 2001 census                     | 12435  |
| 718963003       | Hungarian Roma                                                 | 3675   |
| 414481008       | Indian (racial group)                                          | 203675 |
| 110751000000108 | Indian or British Indian - ethnic category 2001 census         | 757205 |
| 186012005       | Indian sub-continent (NMO)                                     | 825    |
| 275597009       | Indo-Caribbean (NMO)                                           | 80     |
| 275595001       | Iranian (NMO)                                                  | 2565   |
| 89011000000107  | Iranian - ethnic category 2001 census                          | 19215  |
| 186014006       | Irish (NMO)                                                    | 705    |
| 92401000000106  | Irish - ethnic category 2001 census                            | 92830  |
| 977371000000109 | Irish Traveller - Northern Ireland ethnic category 2011 census | 10     |
| 88911000000101  | Irish Traveller - ethnic category 2001 census                  | 815    |
| 315283003       | Irish traveller                                                | 420    |
| 94081000000103  | Israeli - ethnic category 2001 census                          | 535    |
| 93961000000109  | Italian - ethnic category 2001 census                          | 33230  |
| 414551003       | Japanese                                                       | 340    |
| 92761000000103  | Japanese - ethnic category 2001 census                         | 6925   |
| 92651000000105  | Kashmiri - ethnic category 2001 census                         | 1020   |
| 38361009        | Koreans                                                        | 1235   |

Table 9: Count of individual ethnicity code use

|                 |                                                                                                                             |       |
|-----------------|-----------------------------------------------------------------------------------------------------------------------------|-------|
| 93981000000100  | Kosovan - ethnic category 2001 census                                                                                       | 1925  |
| 94091000000101  | Kurdish - ethnic category 2001 census                                                                                       | 13850 |
| 94111000000106  | Latin American - ethnic category 2001 census                                                                                | 7125  |
| 92781000000107  | Malaysian - ethnic category 2001 census                                                                                     | 3760  |
| 94071000000100  | Middle Eastern (excluding Israeli, Iranian and Arab) - ethnic category 2001 census                                          | 16600 |
| 92631000000103  | Mixed Asian - ethnic category 2001 census                                                                                   | 3735  |
| 92721000000106  | Mixed Black - ethnic category 2001 census                                                                                   | 2440  |
| 94021000000104  | Mixed Irish and other White - ethnic category 2001 census                                                                   | 1525  |
| 315239007       | Mixed ethnic census group                                                                                                   | 8585  |
| 976751000000104 | Mixed multiple ethnic groups: White and Asian - England and Wales ethnic category 2011 census                               | 4930  |
| 977431000000100 | Mixed multiple ethnic groups: White and Asian - Northern Ireland ethnic category 2011 census                                | 1535  |
| 976731000000106 | Mixed multiple ethnic groups: White and Black African - England and Wales ethnic category 2011 census                       | 2710  |
| 977411000000108 | Mixed multiple ethnic groups: White and Black African - Northern Ireland ethnic category 2011 census                        | 1140  |
| 976711000000103 | Mixed multiple ethnic groups: White and Black Caribbean - England and Wales ethnic category 2011 census                     | 5985  |
| 977391000000108 | Mixed multiple ethnic groups: White and Black Caribbean - Northern Ireland ethnic category 2011 census                      | 2065  |
| 976771000000108 | Mixed multiple ethnic groups: any other Mixed or multiple ethnic background - England and Wales ethnic category 2011 census | 5830  |
| 977551000000106 | Mixed multiple ethnic groups: any other Mixed or multiple ethnic background - Northern Ireland ethnic category 2011 census  | 325   |
| 978051000000102 | Mixed or multiple ethnic groups: any Mixed or multiple ethnic group - Scotland ethnic category 2011 census                  | 65    |
| 414752008       | Mixed racial group (racial group)                                                                                           | 2910  |
| 94101000000109  | Moroccan - ethnic category 2001 census                                                                                      | 3975  |
| 94121000000100  | Multi-ethnic islands: Mauritian or Seychellois or Maldivian or St Helena - ethnic category 2001 census                      | 2305  |
| 270464009       | N African Arab/Iranian (NMO)                                                                                                | 1700  |
| 718131000000106 | Nepali                                                                                                                      | 5570  |
| 186036009       | New Zealand European                                                                                                        | 505   |
| 186039002       | New Zealand Maori                                                                                                           | 75    |
| 186035008       | New Zealand ethnic groups                                                                                                   | 560   |
| 92731000000108  | Nigerian - ethnic category 2001 census                                                                                      | 11965 |
| 94061000000107  | North African - ethnic category 2001 census                                                                                 | 5180  |
| 275594002       | North African Arab (NMO)                                                                                                    | 1690  |
| 92561000000109  | Northern Irish - ethnic category 2001 census                                                                                | 935   |

Table 9: Count of individual ethnicity code use

|                 |                                                                                                |         |
|-----------------|------------------------------------------------------------------------------------------------|---------|
| 414978006       | Oriental                                                                                       | 170     |
| 92521000000101  | Other - ethnic category 2001 census                                                            | 241880  |
| 186010002       | Other African countries (NMO)                                                                  | 1310    |
| 186013000       | Other Asian (NMO)                                                                              | 6430    |
| 92481000000101  | Other Asian background - ethnic category 2001 census                                           | 305220  |
| 315281001       | Other Asian ethnic group                                                                       | 57510   |
| 92701000000102  | Other Asian or Asian unspecified - ethnic category 2001 census                                 | 15905   |
| 186000006       | Other Black - Black/Asian orig                                                                 | 625     |
| 185999009       | Other Black - Black/White orig                                                                 | 1870    |
| 92501000000105  | Other Black background - ethnic category 2001 census                                           | 52135   |
| 92741000000104  | Other Black or Black unspecified - ethnic category 2001 census                                 | 5080    |
| 186017004       | Other European (NMO)                                                                           | 33265   |
| 186037000       | Other European in New Zealand                                                                  | 50      |
| 92451000000107  | Other Mixed background - ethnic category 2001 census                                           | 122360  |
| 92621000000100  | Other Mixed or Mixed unspecified - ethnic category 2001 census                                 | 7075    |
| 94041000000106  | Other White European or European unspecified or Mixed European - ethnic category 2001 census   | 160190  |
| 92411000000108  | Other White background - ethnic category 2001 census                                           | 1431975 |
| 94051000000109  | Other White or White unspecified - ethnic category 2001 census                                 | 57390   |
| 315279003       | Other black ethnic group                                                                       | 8495    |
| 976951000000102 | Other ethnic group: Arab - England and Wales ethnic category 2011 census                       | 4015    |
| 977851000000109 | Other ethnic group: Arab - Northern Ireland ethnic category 2011 census                        | 150     |
| 978381000000105 | Other ethnic group: Arab, Arab Scottish or Arab British - Scotland ethnic category 2011 census | 280     |
| 976971000000106 | Other ethnic group: any other ethnic group - England and Wales ethnic category 2011 census     | 12815   |
| 977871000000100 | Other ethnic group: any other ethnic group - Northern Ireland ethnic category 2011 census      | 170     |
| 978401000000105 | Other ethnic group: any other ethnic group - Scotland ethnic category 2011 census              | 75      |
| 186005001       | Other ethnic non-mixed (NMO)                                                                   | 14085   |
| 186021006       | Other ethnic, Asian/White origin                                                               | 11335   |
| 186020007       | Other ethnic, Black/White origin                                                               | 1060    |
| 186019001       | Other ethnic, mixed origin                                                                     | 14140   |
| 186022004       | Other ethnic, mixed white origin                                                               | 3060    |

Table 9: Count of individual ethnicity code use

|                 |                                                                                   |        |
|-----------------|-----------------------------------------------------------------------------------|--------|
| 186023009       | Other ethnic, other mixed origin                                                  | 4105   |
| 94031000000102  | Other mixed White - ethnic category 2001 census                                   | 11610  |
| 94011000000105  | Other republics which made up the former Yugoslavia - ethnic category 2001 census | 1625   |
| 401214002       | Other white British ethnic group                                                  | 20850  |
| 186002003       | Pakistani                                                                         | 103375 |
| 92461000000105  | Pakistani or British Pakistani - ethnic category 2001 census                      | 540820 |
| 88941000000100  | Polish - ethnic category 2001 census                                              | 215080 |
| 718964009       | Polish Roma                                                                       | 455    |
| 80208004        | Portuguese                                                                        | 12365  |
| 92641000000107  | Punjabi - ethnic category 2001 census                                             | 5350   |
| 160531006       | Race: West indian                                                                 | 80     |
| 718958002       | Roma                                                                              | 580    |
| 445343003       | Romanian                                                                          | 86070  |
| 718960000       | Romanian Roma                                                                     | 975    |
| 86275006        | Samoan                                                                            | 55     |
| 92541000000108  | Scottish - ethnic category 2001 census                                            | 7655   |
| 88981000000108  | Serbian - ethnic category 2001 census                                             | 1365   |
| 110781000000102 | Sinhalese - ethnic category 2001 census                                           | 310    |
| 36329002        | Slovak                                                                            | 11000  |
| 718961001       | Slovak Roma                                                                       | 2500   |
| 92711000000100  | Somali - ethnic category 2001 census                                              | 17665  |
| 186044009       | South East Asian                                                                  | 1190   |
| 89021000000101  | South and Central American - ethnic category 2001 census                          | 9300   |
| 86461000000107  | Sri Lankan - ethnic category 2001 census                                          | 27370  |
| 92671000000101  | Tamil - ethnic category 2001 census                                               | 2665   |
| 81560001        | Tongan                                                                            | 30     |
| 88921000000107  | Traveller - ethnic category 2001 census                                           | 26330  |
| 275601009       | Turkish (NMO)                                                                     | 2415   |
| 110401000000103 | Turkish - ethnic category 2001 census                                             | 16270  |
| 275602002       | Turkish Cypriot (NMO)                                                             | 215    |

Table 9: Count of individual ethnicity code use

|                 |                                                                                                                  |         |
|-----------------|------------------------------------------------------------------------------------------------------------------|---------|
| 93951000000106  | Turkish Cypriot - ethnic category 2001 census                                                                    | 1415    |
| 270467002       | Turkish/Turkish Cypriot (NMO)                                                                                    | 970     |
| 93921000000101  | Ulster Scots - ethnic category 2001 census                                                                       | 20      |
| 312859007       | Vietnamese                                                                                                       | 2145    |
| 92751000000101  | Vietnamese - ethnic category 2001 census                                                                         | 4450    |
| 92551000000106  | Welsh - ethnic category 2001 census                                                                              | 4510    |
| 275592003       | West Indian (NMO)                                                                                                | 360     |
| 977351000000100 | White - Northern Ireland ethnic category 2011 census                                                             | 200     |
| 185984009       | White - ethnic group                                                                                             | 920270  |
| 315236000       | White British                                                                                                    | 5746445 |
| 494131000000105 | White British - ethnic category 2001 census                                                                      | 4156730 |
| 315237009       | White Irish                                                                                                      | 37325   |
| 494161000000100 | White Irish - ethnic category 2001 census                                                                        | 25740   |
| 401213008       | White Scottish                                                                                                   | 7505    |
| 92441000000109  | White and Asian - ethnic category 2001 census                                                                    | 92835   |
| 92431000000100  | White and Black African - ethnic category 2001 census                                                            | 89460   |
| 92421000000102  | White and Black Caribbean - ethnic category 2001 census                                                          | 93915   |
| 976631000000101 | White: English or Welsh or Scottish or Northern Irish or British - England and Wales ethnic category 2011 census | 726825  |
| 976671000000104 | White: Gypsy or Irish Traveller - England and Wales ethnic category 2011 census                                  | 735     |
| 977971000000108 | White: Gypsy or Irish Traveller - Scotland ethnic category 2011 census                                           | 25      |
| 976651000000108 | White: Irish - England and Wales ethnic category 2011 census                                                     | 7315    |
| 977951000000104 | White: Irish - Scotland ethnic category 2011 census                                                              | 70      |
| 978011000000101 | White: Polish - Scotland ethnic category 2011 census                                                             | 2595    |
| 977911000000103 | White: Scottish - Scotland ethnic category 2011 census                                                           | 500     |
| 976691000000100 | White: any other White background - England and Wales ethnic category 2011 census                                | 71540   |
| 978031000000109 | White: any other White ethnic group - Scotland ethnic category 2011 census                                       | 1290    |
| 977931000000106 | White: other British - Scotland ethnic category 2011 census                                                      | 2220    |
| 296841000000102 | Yemeni                                                                                                           | 590     |
