# Supplementary material for: Consistency, completeness and external validity of ethnicity recording in NHS primary care records: a cohort study in 25 million patients’ records at source using OpenSAFELY
Source: bioRxiv or medRxiv preprint supplement (doi:10.1101/2023.11.21.23298690), 2023-11-22

Figure 2: Barplot showing the proportion of 2021 Census and TPP populations (amended to 2021 grouping) per ethnicity grouped into 5 groups per NUTS-1 region (excluding those without a recorded ethnicity). Annotated with percentage point difference between 2021 Census and TPP populations.

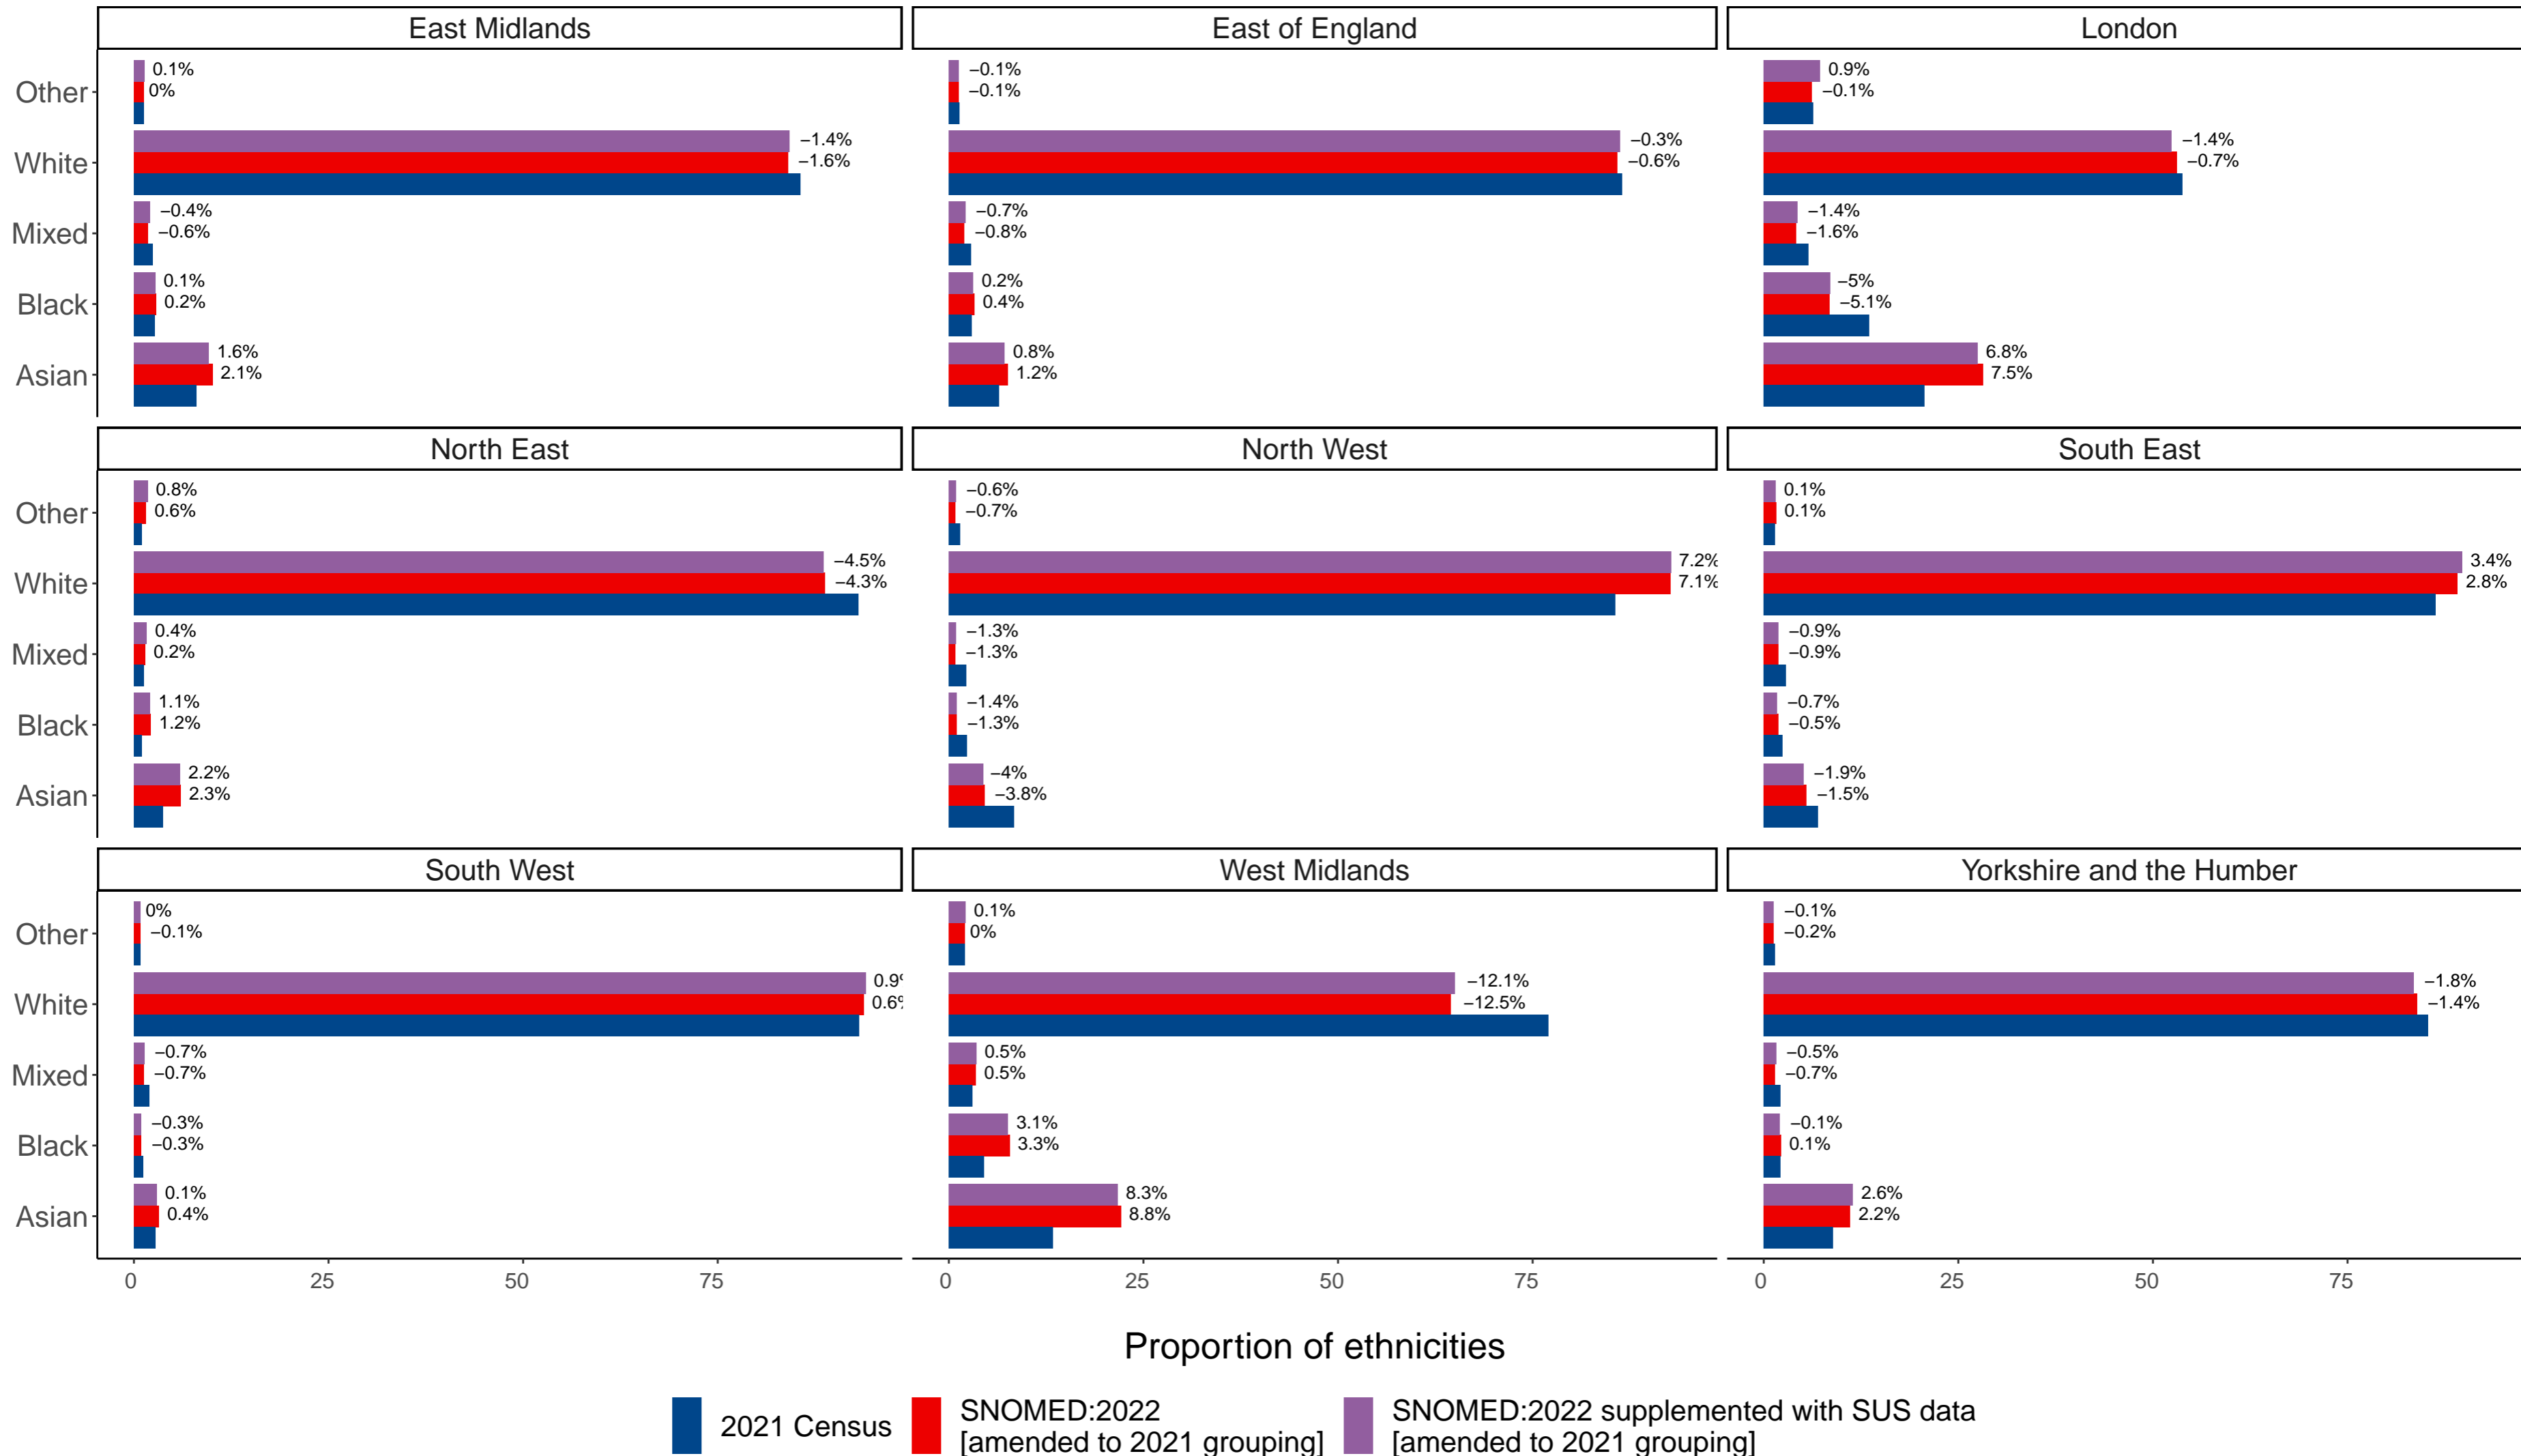

Supplement: Supplementary file [file media-11.pdf]
