# Supplementary material for: Consistency, completeness and external validity of ethnicity recording in NHS primary care records: a cohort study in 25 million patients’ records at source using OpenSAFELY
Source: bioRxiv or medRxiv preprint supplement (doi:10.1101/2023.11.21.23298690), 2023-11-22

Figure 3: Recording of ethnicity over time for latest and first recorded ethnicity. Unknown dates of recording may be stored as '1900-01-01'

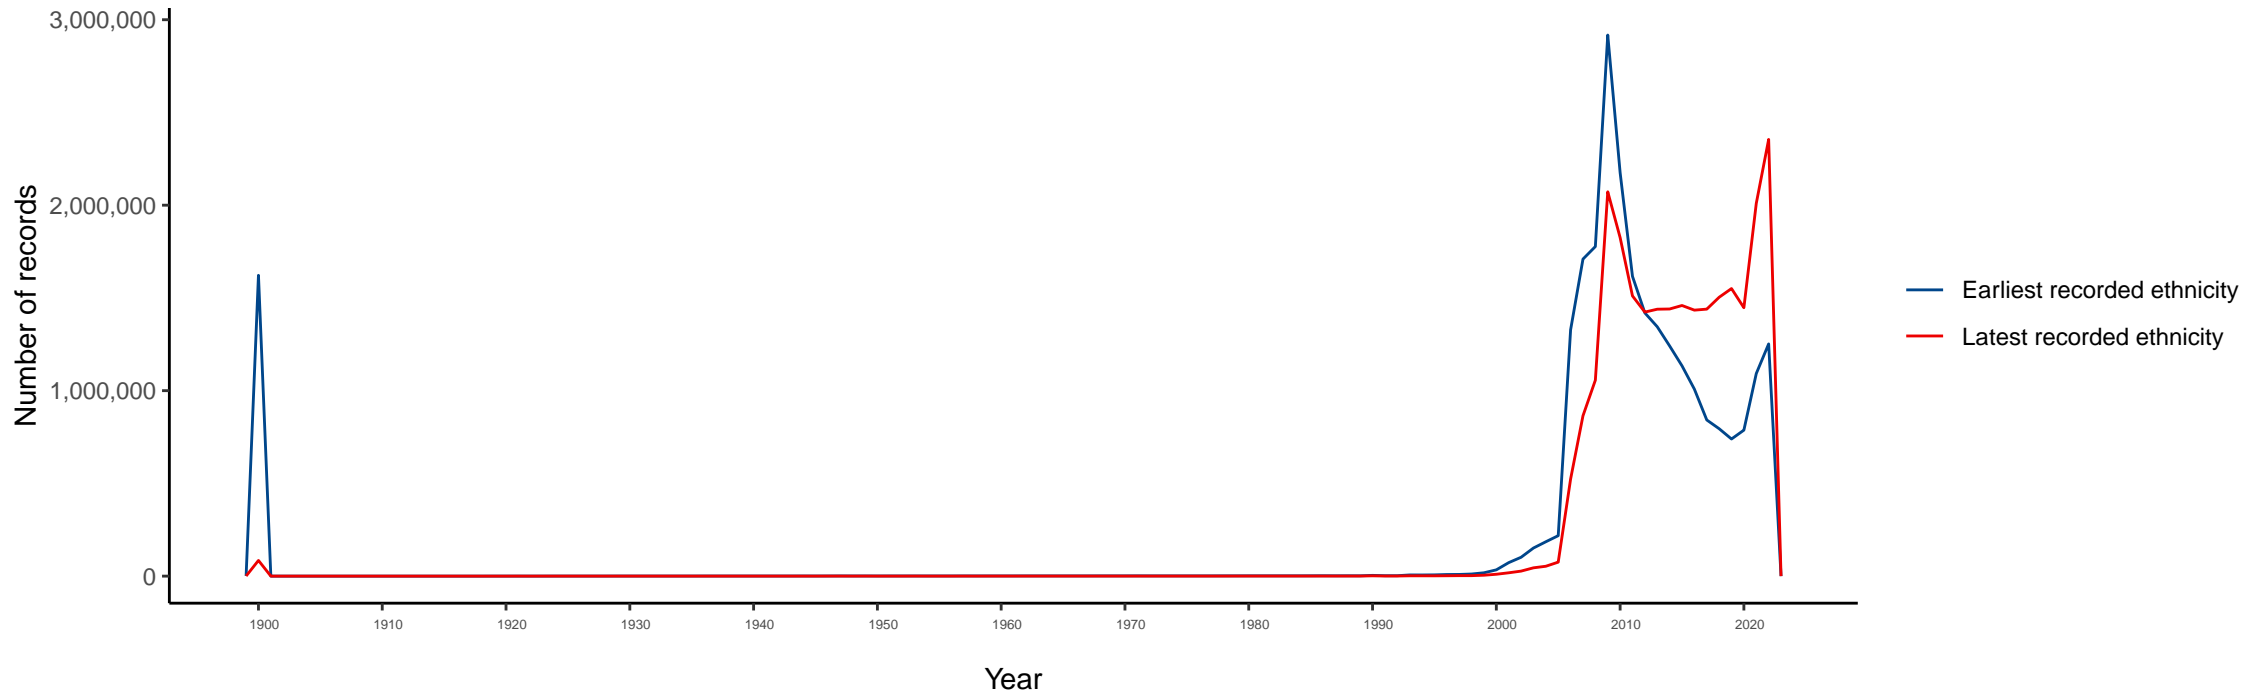

Supplement: Supplementary file [file media-12.pdf]
